# Supplementary material for: Diversification dynamics in the Neotropics through time, clades, and biogeographic regions
Source: eLife journal article supplement (doi:10.7554/elife.74503), 2022-10-27
Supplement: supp [file elife-74503-supp-v1.zip]

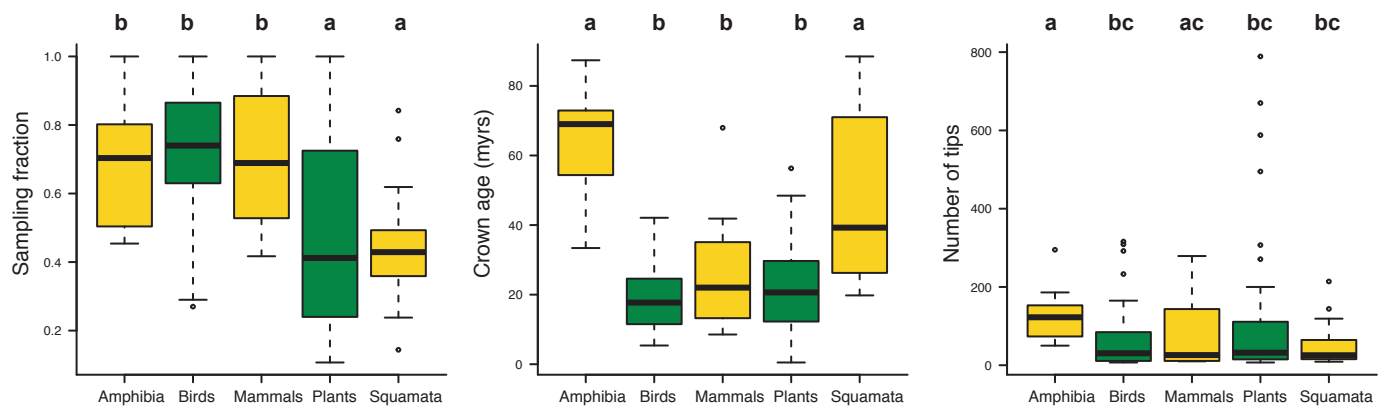

**Figure 2 - figure supplement 2.** Box plots showing differences in sampling fraction, clade age (*i.e.* crown age), and number of species per tree (*i.e.* tree size) for the different taxonomic groups considered in this study (Amphibia, Birds, Mammals, Plants, Squamata). Letters are used to denote statistically differences between groups, with groups showing significant differences in mean values denoted with different letters.
