# Supplementary material for: Diversification dynamics in the Neotropics through time, clades, and biogeographic regions
Source: eLife journal article supplement (doi:10.7554/elife.74503), 2022-10-27
Supplement: supp [file elife-74503-supp-v1.zip]

**Figure 2 - figure supplement 1**

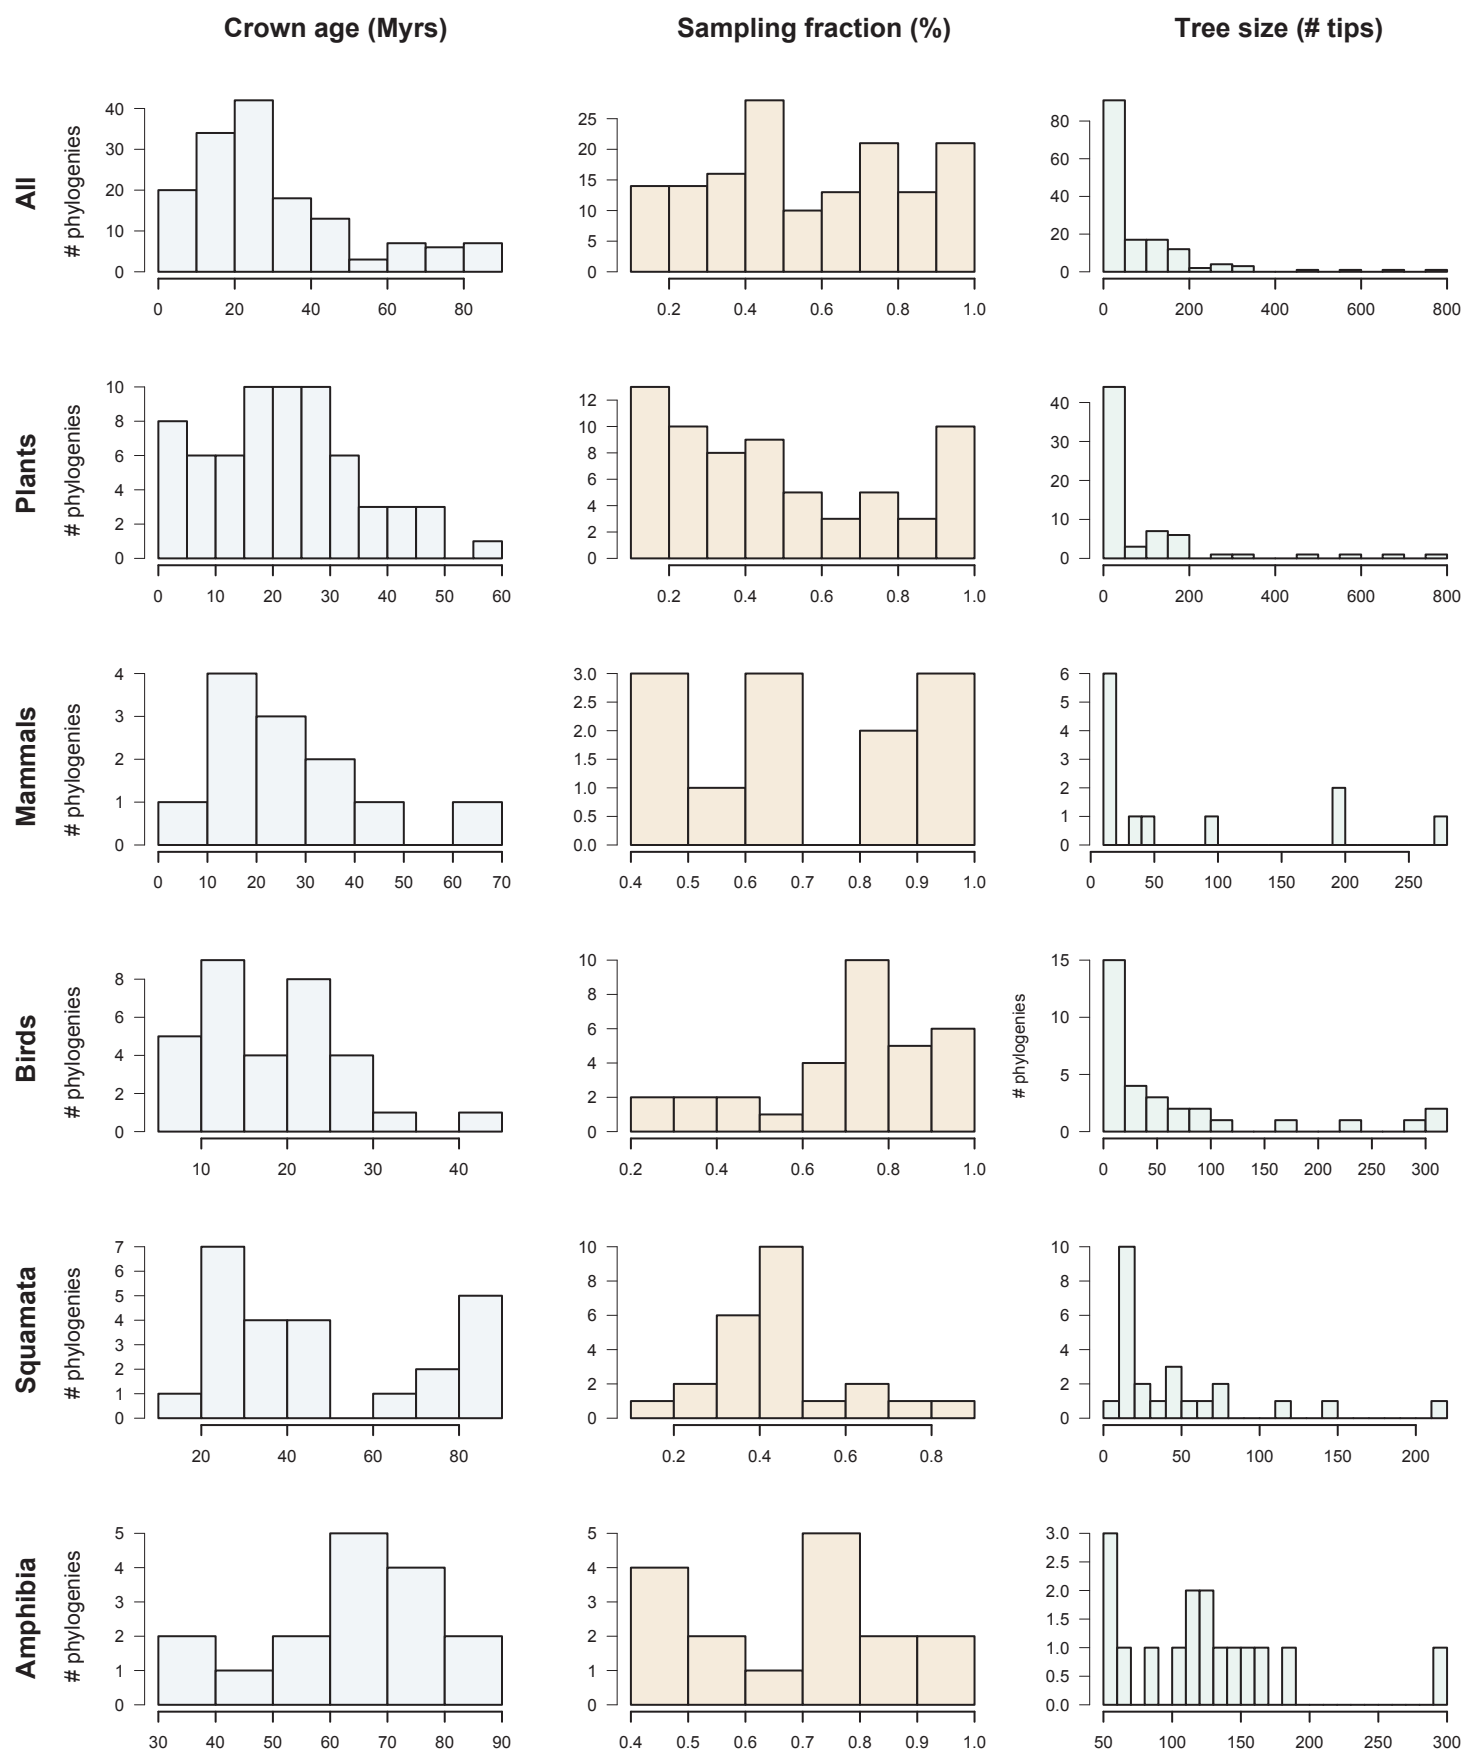

**Figure-2 - figure supplement 1.** Dataset overview. The histograms represent the clade age (crown age in million years “Myrs”), sampling fraction (% of described species represented in the trees) and number of tips for the 150 phylogenies of plants, mammals, birds, squamates and amphibians.
