# Supplementary material for: Diversification dynamics in the Neotropics through time, clades, and biogeographic regions
Source: eLife journal article supplement (doi:10.7554/elife.74503), 2022-10-27
Supplement: supp [file elife-74503-supp-v1.zip]

**Figure 6 - figure supplement 2**

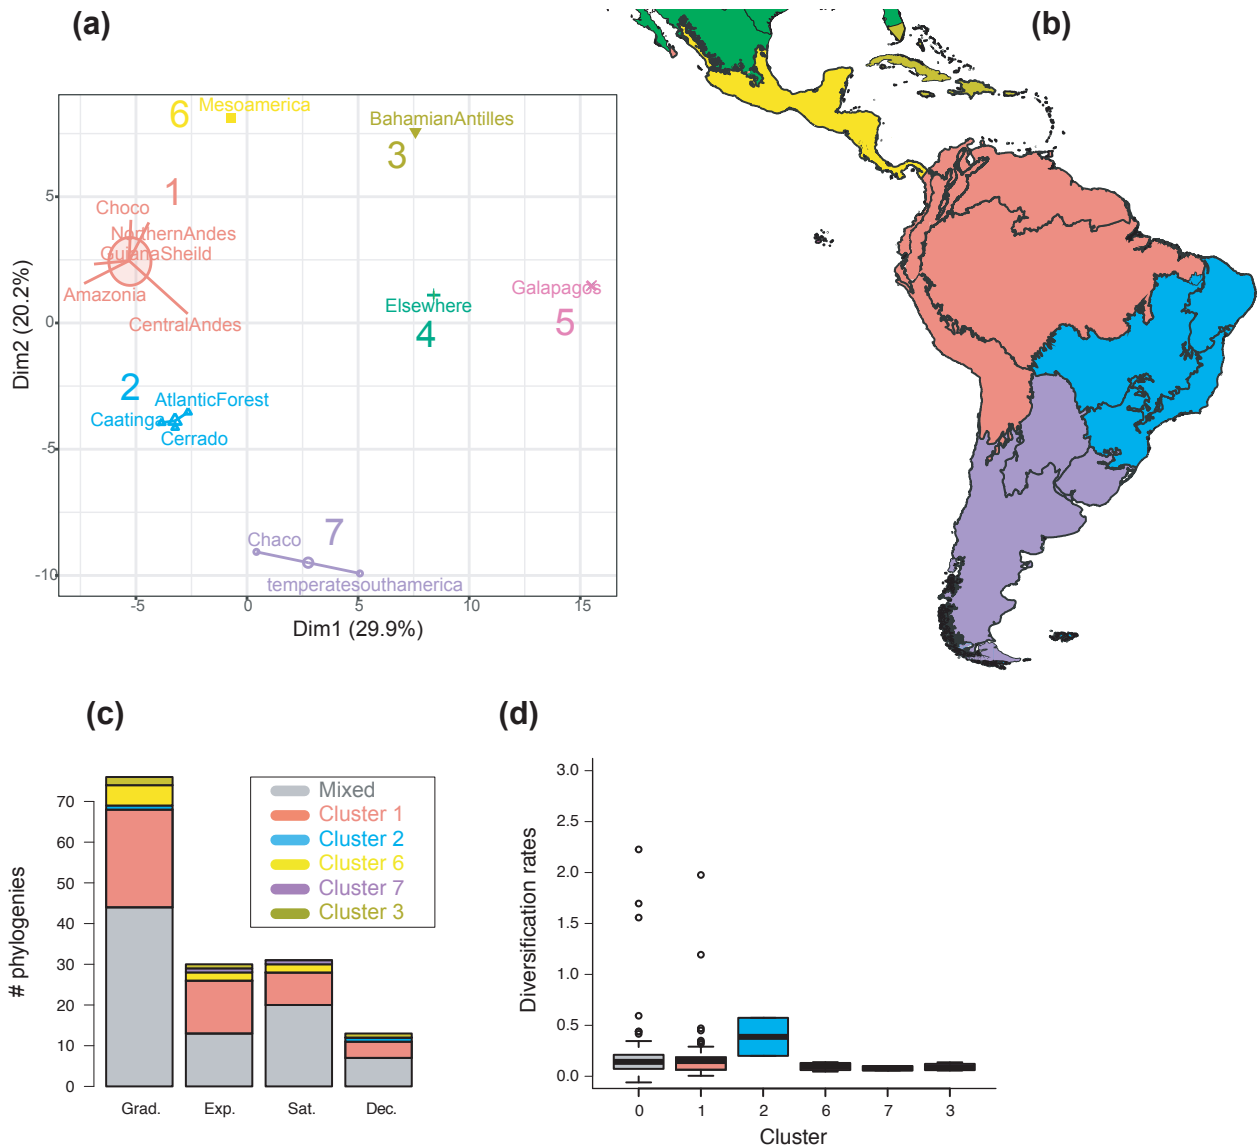

**Figure 6 - figure supplement 2. The geographic structure of long-term Neotropical diversification.** **(a)** PCA representation of K-means clustering results for 13 areas (WWF ecoregions) and 150 clades. **(b)** Resulting clusters (1–7) on the geographic space. Colors correspond with the clusters of regions identified in (a), thick lines delineate the original ecoregions used in the analyses. **(c)** Number of phylogenies best fitting species richness scenarios (Sc. 1–4 (Grad = Gradual increase [Sc.1], Exp = Exponential increase [Sc.2], Sat = Saturated increase [Sc.3] and Dec = Declining diversity [Sc.4]) across geographic clusters as derived from canonical diversification rates. **(d)** Variation in diversification rates (derived from the constant-rate model) across geographic clusters.
