# Supplementary material for: Diversification dynamics in the Neotropics through time, clades, and biogeographic regions
Source: eLife journal article supplement (doi:10.7554/elife.74503), 2022-10-27
Supplement: supp [file elife-74503-supp-v1.zip]

**Figure 4 - figure supplement 1**

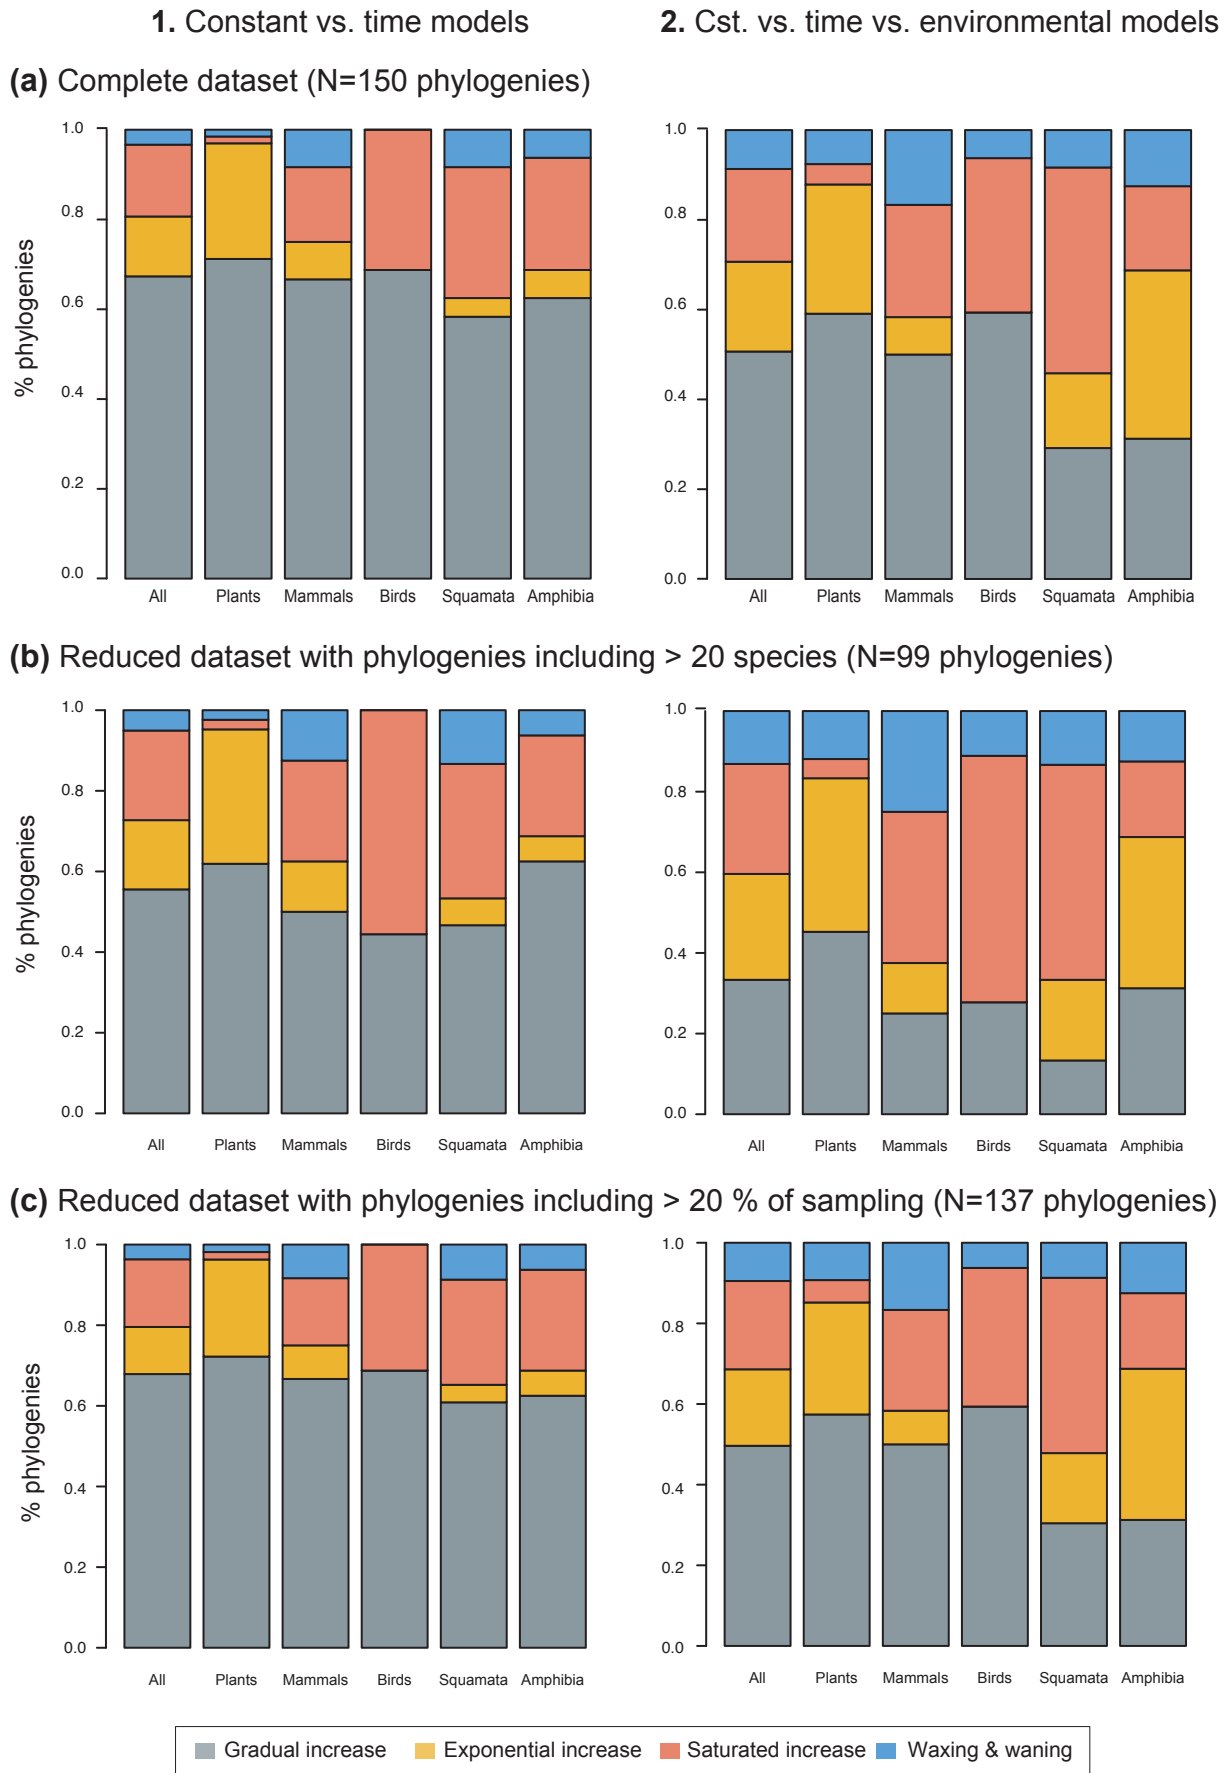

**Figure-4 - figure supplement 1. Species richness dynamics on 150 phylogenies of Neotropical plants and tetrapods.** The histograms show the proportion of phylogenies best fitting gradual increase (Sc. 1), exponential increase (Sc. 2), saturated increase (Sc. 3) and waxing & waning (Sc. 4) species richness dynamics, as derived from diversification rates when comparing **(1)** time-dependent against constant models, and **(2)** environmental (time- and uplift dependent) models against time-dependent and constant models. The results are reported for **(a)** the complete dataset, **(b)** a reduced dataset including only trees with more than 20 species, and **(c)** a reduced dataset including only trees with a sampling fraction over 20%. Abbreviations: Cst = constant.
