# Supplementary material for: Diversification dynamics in the Neotropics through time, clades, and biogeographic regions
Source: eLife journal article supplement (doi:10.7554/elife.74503), 2022-10-27
Supplement: supp [file elife-74503-supp-v1.zip]

**Figure 5 - figure supplement 1**

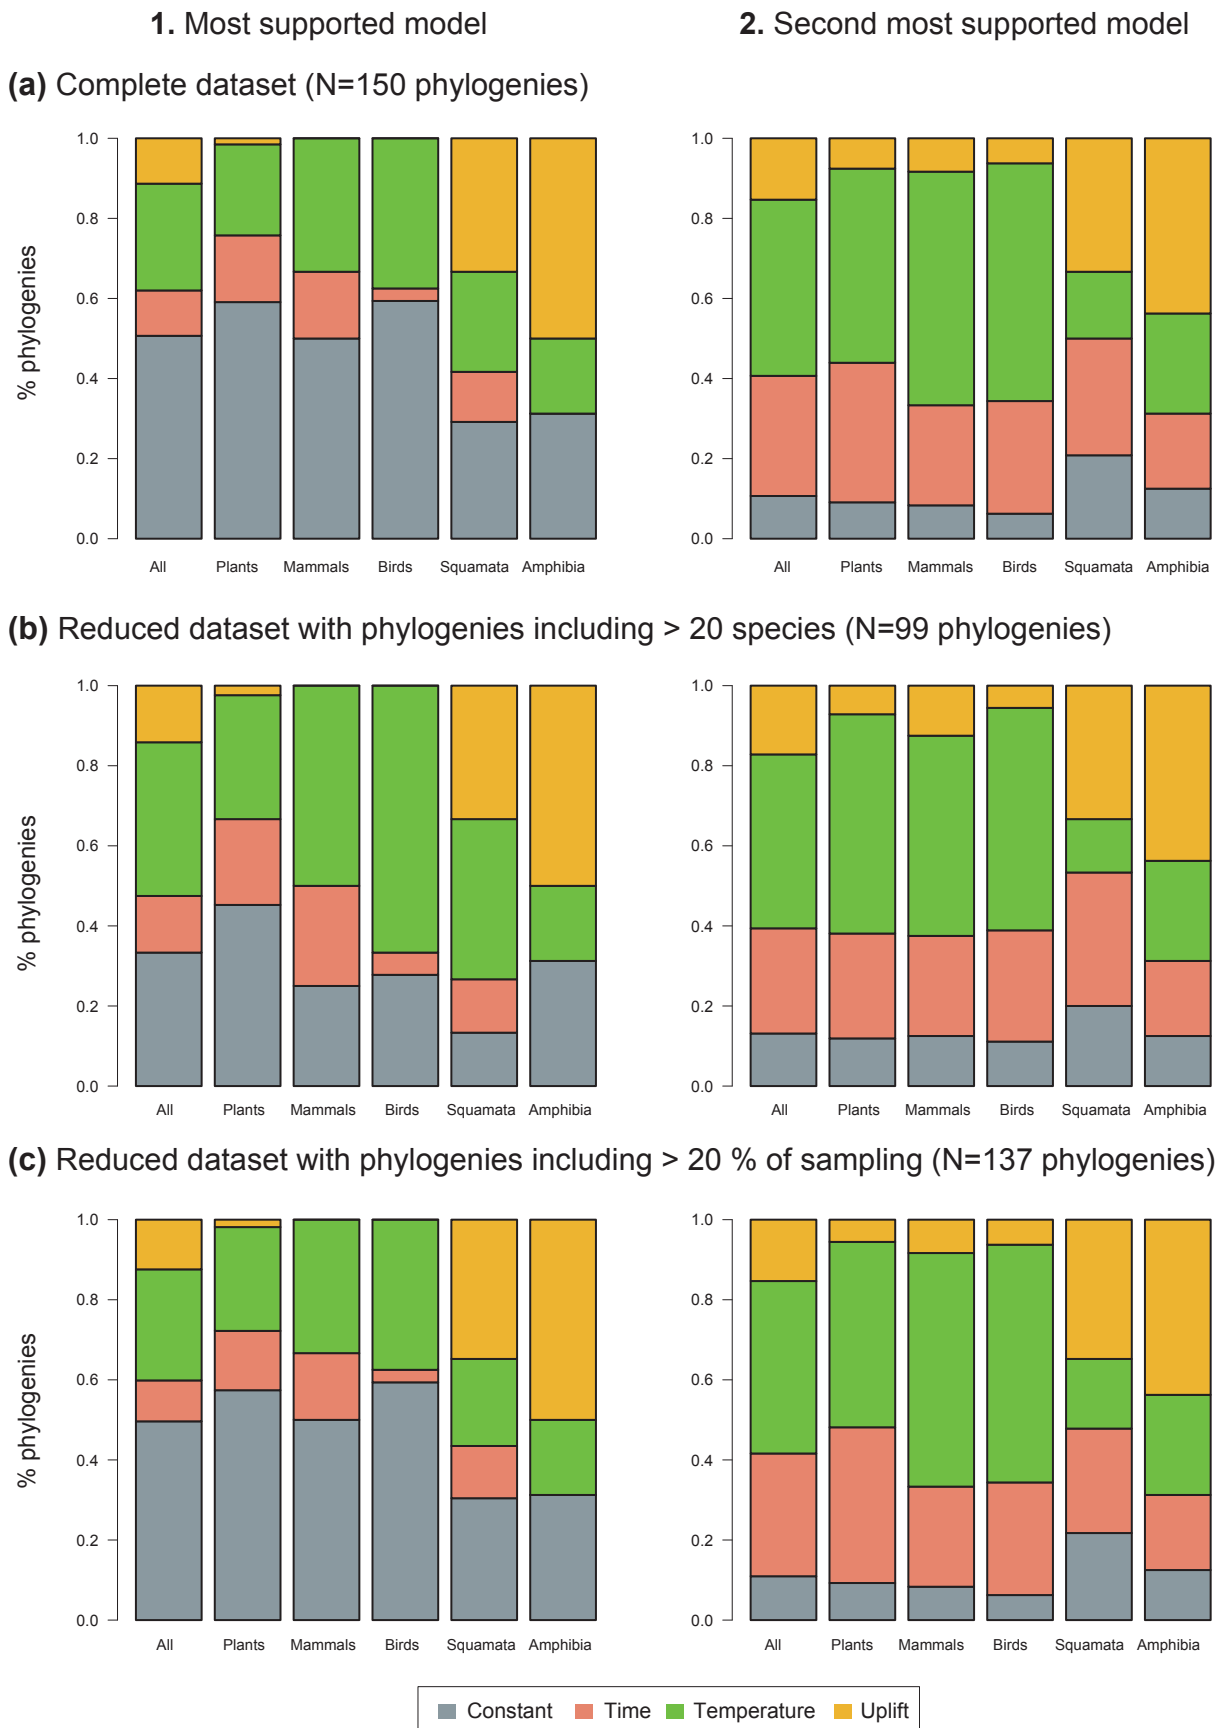

**Figure-5 - figure supplement 1. Drivers of Neotropical diversification.** The histograms report the proportion of phylogenies whose diversification rates are best explained by a model with constant, time-dependent, temperature-dependent, or uplift-dependent diversification based on **(1)** the most supported model (lowest AIC value), and **(2)** the second most supported model. The results are reported for the complete dataset **(a)**, for a reduced dataset including only trees with more than 20 species **(b)**, and for a reduced dataset including only trees with a sampling fraction over 20% **(c)**.
