# Supplementary material for: Diversification dynamics in the Neotropics through time, clades, and biogeographic regions
Source: eLife journal article supplement (doi:10.7554/elife.74503), 2022-10-27
Supplement: supp [file elife-74503-supp-v1.zip]

Archive with 21 entries (21 files):
- elife_poa_e74503_Transparent_Reporting_File.docx
- elife_poa_e74503_Figure_2_figure_supplement_1.pdf
- elife_poa_e74503_Figure_2_figure_supplement_2.pdf
- elife_poa_e74503_Figure_3_figure_supplement_1.pdf
- elife_poa_e74503_Figure_4_figure_supplement_1.pdf
- elife_poa_e74503_Figure_5_figure_supplement_1.pdf
- elife_poa_e74503_Figure_5_figure_supplement_2.pdf
- elife_poa_e74503_Figure_6_figure_supplement_1.pdf
- elife_poa_e74503_Figure_6_figure_supplement_2.pdf
- elife_poa_e74503_Figure_2_source_data_1.docx
- elife_poa_e74503_Figure_3_source_data_1.docx
- elife_poa_e74503_Figure_3_source_data_2.docx
- elife_poa_e74503_Figure_4_source_data_1.docx
- elife_poa_e74503_Figure_5_source_data_1.docx
- elife_poa_e74503_Figure_5_source_data_2.docx
- elife_poa_e74503_Figure_6_source_data_1.docx
- elife_poa_e74503_Figure_6_source_data_2.docx
- elife_poa_e74503_Figure_6_source_data_3.docx
- elife_poa_e74503_Figure_6_source_data_4.docx
- elife_poa_e74503_Supplementary_file_1.docx
- elife_poa_e74503_Supplementary_file_2.docx
