# Supplementary material for: Diversification dynamics in the Neotropics through time, clades, and biogeographic regions
Source: eLife journal article supplement (doi:10.7554/elife.74503), 2022-10-27
Supplement: supp [file elife-74503-supp-v1.zip › elife_poa_e74503_Figure_3_figure_supplement_1.pdf]

**Figure 3 - figure supplement 1**

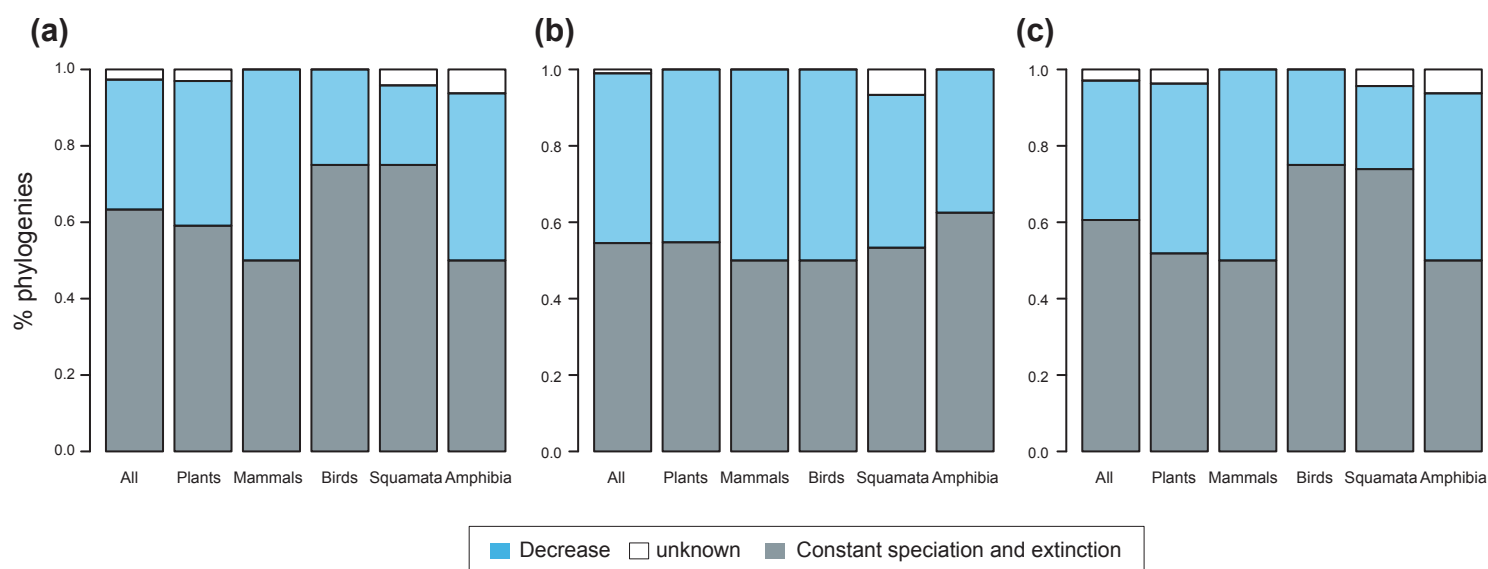

**Figure-3 - figure supplement 1. Speciation trends on 150 phylogenies of Neotropical plants and tetrapods.**

The histograms show the proportion of phylogenies best fitting constant vs. time-variable diversification models, as derived from pulled diversification rates for **(a)** the complete dataset, **(b)** a reduced dataset including only trees with more than 20 species (N=99), and **(c)** a reduced dataset including only trees with a sampling fraction over 20% (N=137). Speciation trends are derived from present-day pulled extinction rates  $\mu p(0)$ : negative present-day pulled extinction rates values ( $\mu p(0) < 0$ ) indicate decreasing speciation trends through time (Louca & Pennell, 2020). Positive  $\mu p(0) > 0$  values are possible under both increasing or decreasing speciation rates, in which case speciation trends are designed as “unknown”.
