# Supplementary material for: Diversification dynamics in the Neotropics through time, clades, and biogeographic regions
Source: eLife journal article supplement (doi:10.7554/elife.74503), 2022-10-27
Supplement: supp [file elife-74503-supp-v1.zip › elife_poa_e74503_Figure_5_source_data_1.docx]

**Figure 5, Source Data 1.**

Number of phylogenies and species supporting different diversification models (among time-constant and time-variable), and diversification drivers (among time, temperature, Andean uplift) in this study.

|  |  | All | Plants | Mammals | Birds | Squamata | Amphibia |
| --- | --- | --- | --- | --- | --- | --- | --- |
|  | Total # of clades | 150 | 66 | 12 | 32 | 24 | 16 |
|  | Total # of species | 12512 | 6222 | 922 | 2216 | 1148 | 2004 |
| Diversification trend | # clades constant | 76 | 39 | 6 | 19 | 7 | 5 |
| # clades time-variable | 74 | 27 | 6 | 13 | 17 | 11 |
| # species constant | 2989 | 1785 | 117 | 457 | 116 | 514 |
| # species time-variable | 9523 | 4437 | 805 | 1759 | 1032 | 1490 |
| Environmental driver | Time-dependent models | 17 | 11 | 2 | 1 | 3 | 0 |
| Temperature-dependent models | 40 | 15 | 4 | 12 | 6 | 3 |
| Uplift-dependent models | 17 | 1 | 0 | 0 | 8 | 8 |
