# Supplementary material for: Diversification dynamics in the Neotropics through time, clades, and biogeographic regions
Source: eLife journal article supplement (doi:10.7554/elife.74503), 2022-10-27
Supplement: supp [file elife-74503-supp-v1.zip › elife_poa_e74503_Figure_6_figure_supplement_1.pdf]

Figure 6 - figure supplement 1

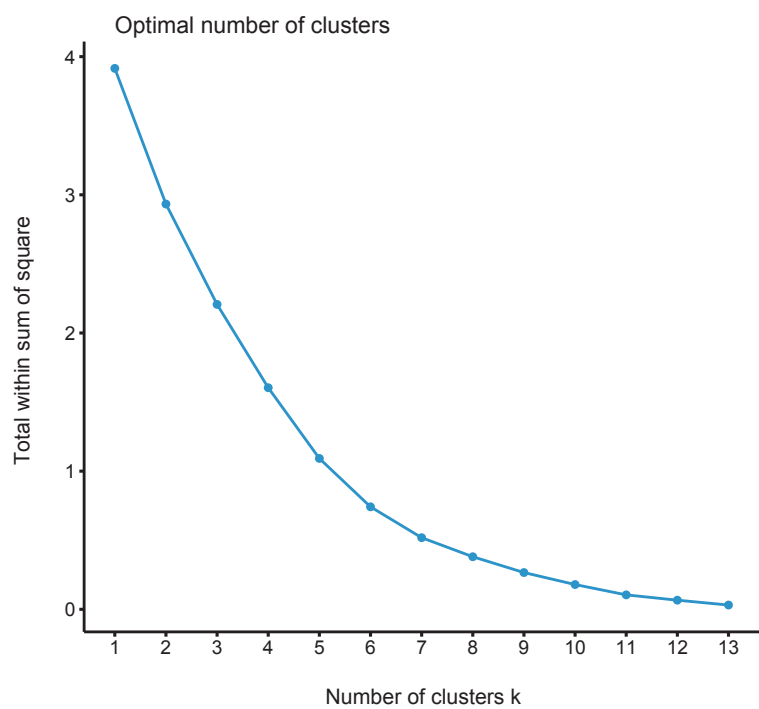

Figure 6 - figure supplement 1. Elbow curve for K means clustering results.
